# Supplementary material for: Multifunctional carbon foam with hollow microspheres and a concave–convex microstructure for adjustable electromagnetic wave absorption and wearable applications
Source: Royal Society of Chemistry journal article supplement (doi:10.1039/d1ta07527f), 2021-01-01
Supplement: d1ta07527f1.pdf [file d1ta07527f1.pdf]

# **Multifunctional carbon foam with hollow-microspheres and concave-convex microstructure for adjustable electromagnetic wave absorption and wearable applications**

Yingying He<sup>a</sup>, Peiying Xie<sup>a</sup>, Shuai Li<sup>a</sup>, Yanan Wang<sup>a</sup>, Daogui Liao<sup>a</sup>, Hongxia Liu<sup>\*a</sup>,  
Li Zhou<sup>a</sup>, Yunhua Chen<sup>\*b</sup>

<sup>a</sup> Guangxi Key Laboratory of Optical and Electronic Materials and Devices, and School of Material Science and Engineering, College of Material Science & Engineering, Guilin University of Technology, Guilin 541004, China

<sup>b</sup> School of Materials Science and Engineering, South China University of Technology, Guangzhou 510640, China

\*Corresponding author

Tel: +86-773-5896438

Fax: +86-773-5896211

E-mail: hliu28551@gmail.com (Liu); yhchen0723@gmail.com (Chen)

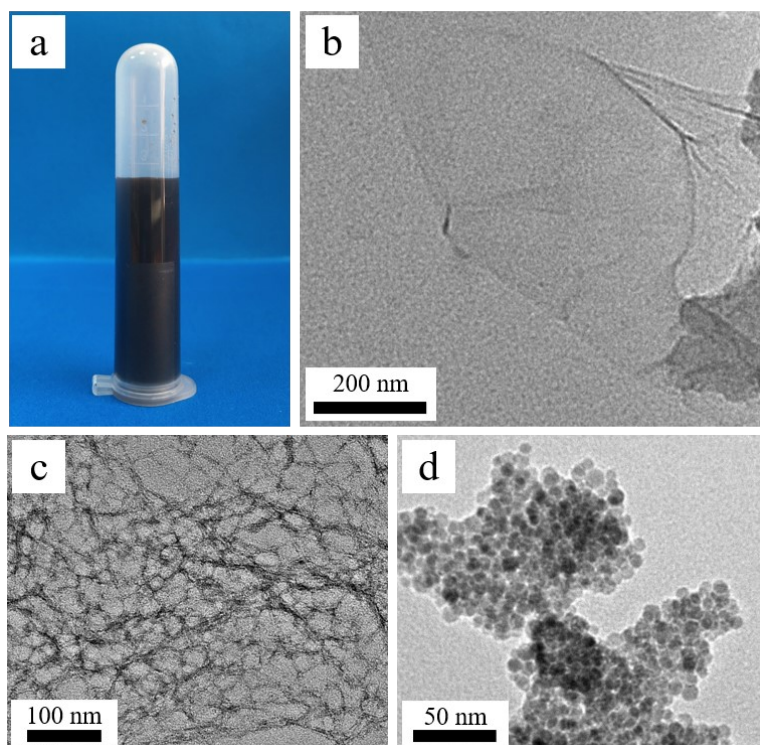

**Fig. S1** (a) Digital photo of GO aqueous dispersion, (b) TEM images of GO, CNF and  $\text{Fe}_3\text{O}_4$  nanoparticles.

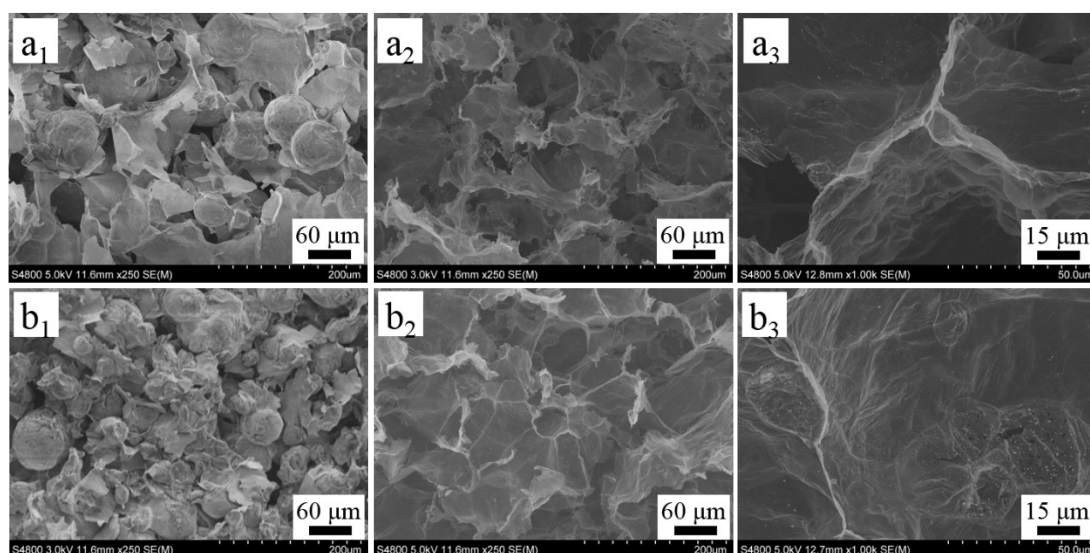

**Fig. S2.** SEM images of CNF/GO/PW-30/ $\text{Fe}_3\text{O}_4$ -1.0 composite foams obtained at water-oil volume ratios of (a<sub>1</sub>) 5:1 and (b<sub>1</sub>) 7:1 before carbonization and after carbonization (a<sub>2-3</sub>, b<sub>2-3</sub>).

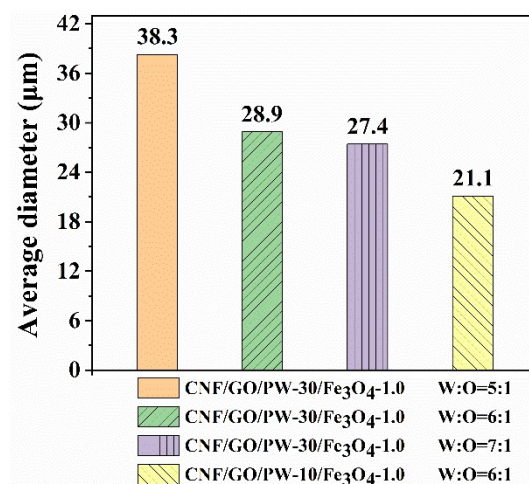

**Fig. S3.** The corresponding statistical graph of the average diameter of the PW microspheres in the composite foams.

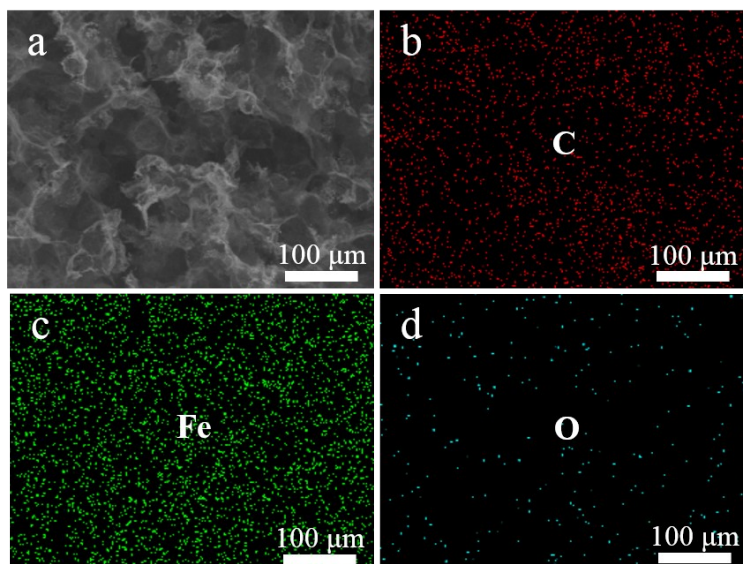

**Fig. S4.** SEM-mapping pattern of the (a) C-rGO/Fe<sub>3</sub>O<sub>4</sub>-1.0 carbon foam: (b) C element, (c) Fe element and (d) O element.

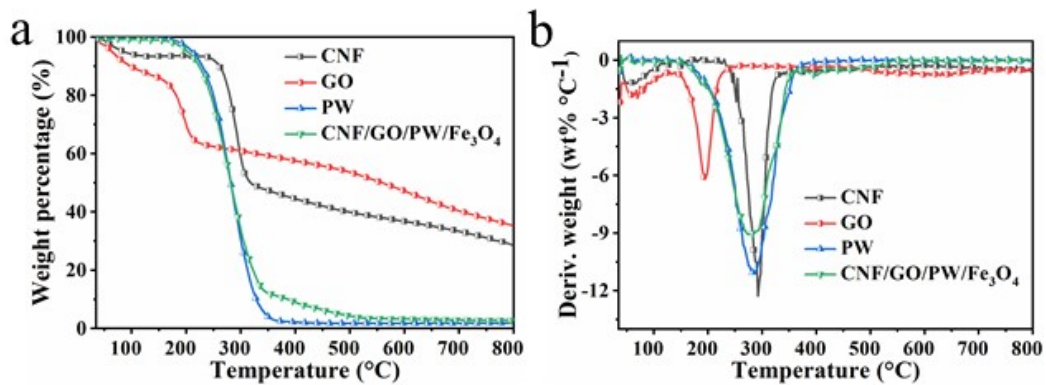

**Fig. S5.** (a) TG and (b) DTG curve of CNF, GO, PW and CNF/GO/PW-30/Fe<sub>3</sub>O<sub>4</sub>-2.0 composite foam.

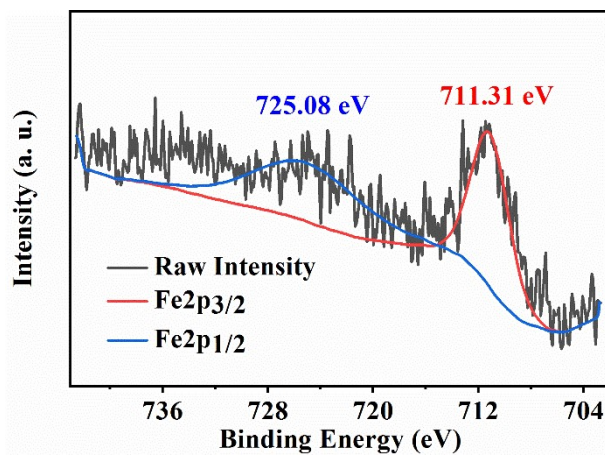

**Fig. S6.** XPS spectrum of Fe2p of C-rGO/Fe<sub>3</sub>O<sub>4</sub>-2.5 carbon foam.

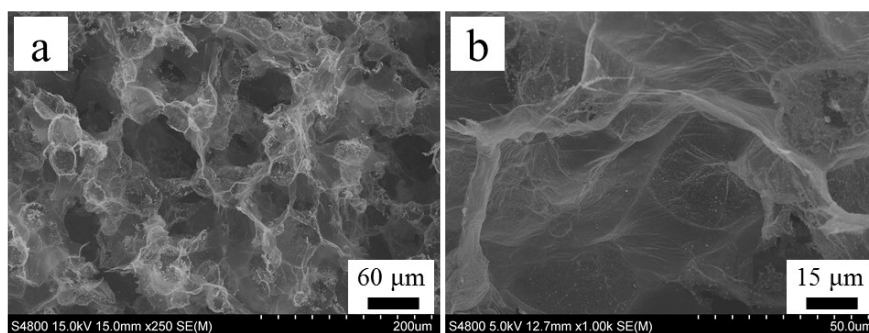

**Fig. S7.** Different magnification times SEM photos of C-rGO/Fe<sub>3</sub>O<sub>4</sub>-2.5 carbon foam after 1000 time cycled compression at 60% strain.

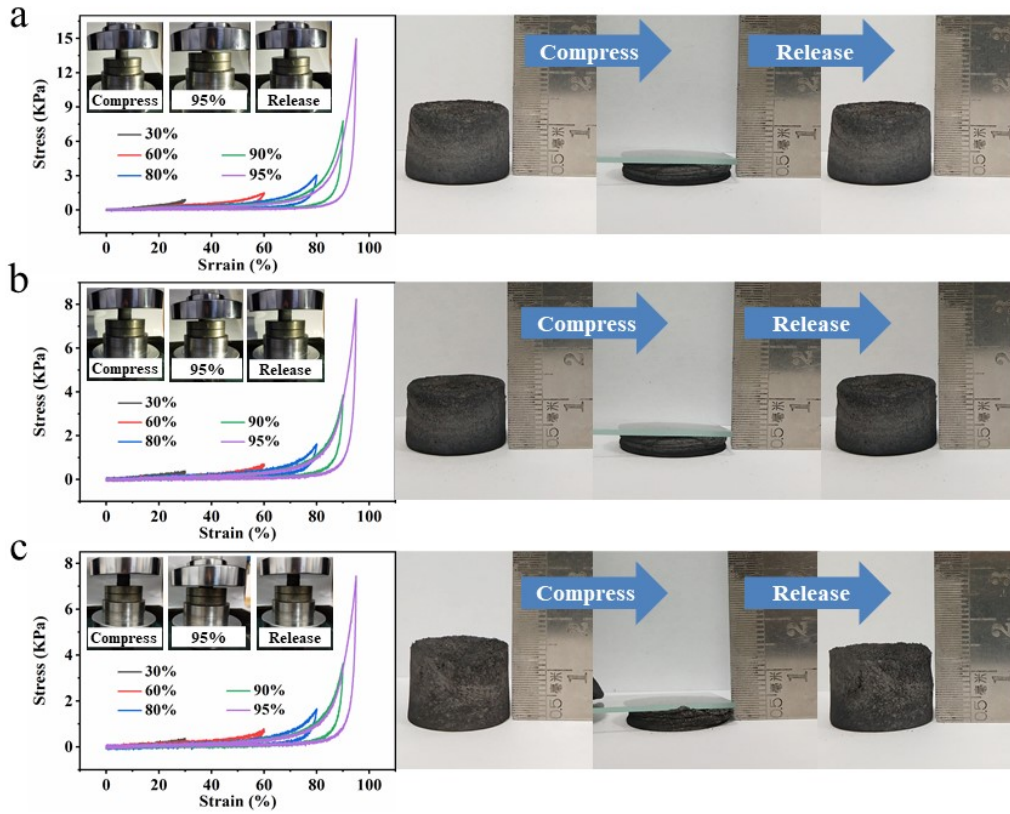

**Fig. S8.** Stress-strain curves (left) and digital photos (right) of (a) C-rGO/Fe<sub>3</sub>O<sub>4</sub>-1.0, (b) C-rGO/Fe<sub>3</sub>O<sub>4</sub>-2.0, and (c) C-rGO/Fe<sub>3</sub>O<sub>4</sub>-2.5 carbon foams.

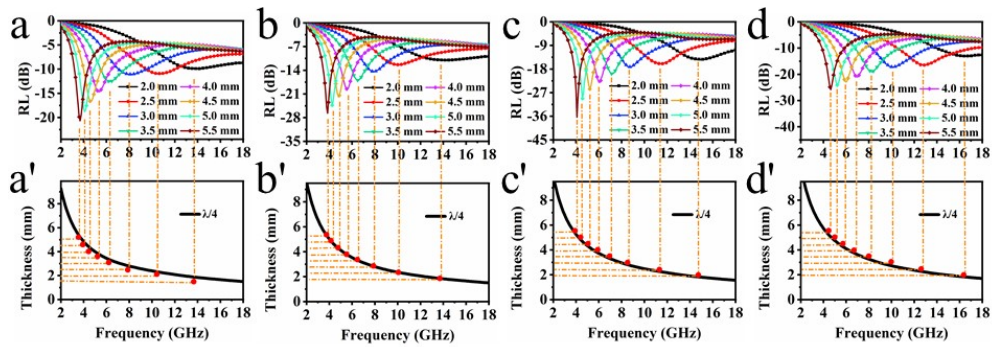

**Fig. S9.** Simulation of absorber thickness versus peak frequency for (a) C-rGO/Fe<sub>3</sub>O<sub>4</sub>-1.0, (b) C-rGO/Fe<sub>3</sub>O<sub>4</sub>-2.0, (c) C-rGO/Fe<sub>3</sub>O<sub>4</sub>-2.5 and (d) C-rGO/Fe<sub>3</sub>O<sub>4</sub>-3.0 carbon foams.

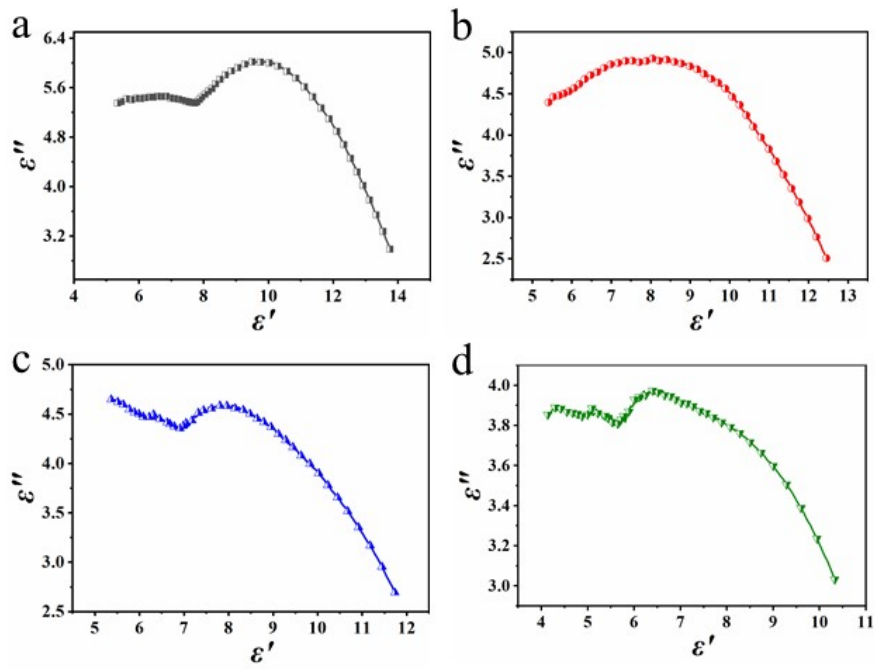

**Fig. S10.** Dielectric Cole-Cole semicircles of (a) C-rGO/Fe<sub>3</sub>O<sub>4</sub>-1.0, (b) C-rGO/Fe<sub>3</sub>O<sub>4</sub>-2.0, (c) C-rGO/Fe<sub>3</sub>O<sub>4</sub>-2.5 and (d) C-rGO/Fe<sub>3</sub>O<sub>4</sub>-3.0 carbon foams.

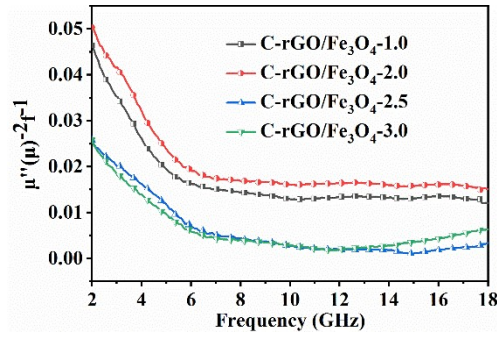

**Fig. S11.** Frequency dependence of  $\mu''(\mu')^{-2}f^{-1}$  values for the carbon foams.

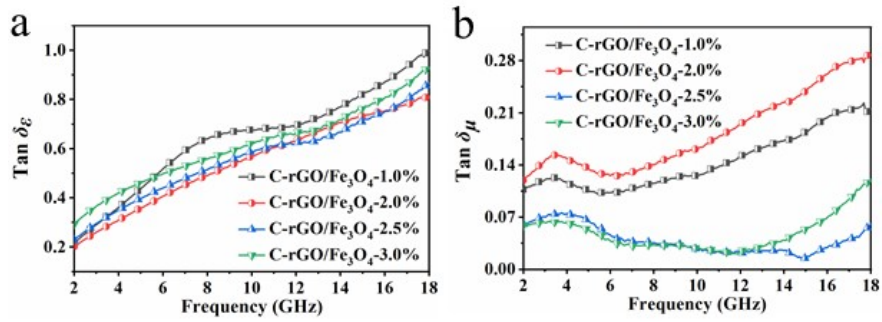

**Fig. S12.** (a) Dielectric loss tangent and (b) magnetic loss tangent of C-rGO/Fe<sub>3</sub>O<sub>4</sub> carbon foams.

**Table S1.** Experimental recipes of preparing Pickering emulsion gels stabilized by CNFs.

| Sample                                           | aqueous :<br>oil (V/V) | PW<br>concentration<br>(wt%) | Fe <sub>3</sub> O <sub>4</sub><br>concentration<br>(wt%) |
|--------------------------------------------------|------------------------|------------------------------|----------------------------------------------------------|
| CNF/GO/PW-30/Fe <sub>3</sub> O <sub>4</sub> -1.0 | 5:1                    | 30                           | 1.0                                                      |
| CNF/GO/PW-30/Fe <sub>3</sub> O <sub>4</sub> -1.0 | 6:1                    | 30                           | 1.0                                                      |
| CNF/GO/PW-30/Fe <sub>3</sub> O <sub>4</sub> -1.0 | 7:1                    | 30                           | 1.0                                                      |
| CNF/GO/PW-10/Fe <sub>3</sub> O <sub>4</sub> -1.0 | 6:1                    | 10                           | 1.0                                                      |
| CNF/GO/PW-30/Fe <sub>3</sub> O <sub>4</sub> -0.5 | 6:1                    | 30                           | 0.5                                                      |
| CNF/GO/PW-30/Fe <sub>3</sub> O <sub>4</sub> -2.0 | 6:1                    | 30                           | 2.0                                                      |
| CNF/GO/PW-30/Fe <sub>3</sub> O <sub>4</sub> -2.5 | 6:1                    | 30                           | 2.5                                                      |
| CNF/GO/PW-30/Fe <sub>3</sub> O <sub>4</sub> -3.0 | 6:1                    | 30                           | 3.0                                                      |

<sup>a</sup> The density of PW is 0.9 g/cm<sup>3</sup>.



**Table S2.** Electromagnetic wave absorption properties of carbon-based absorbers in this work and the other previous literatures.

| Absorbers                                                     | RL <sub>min</sub> (dB) | Thickness (mm) | Effective bandwidth (GHz) | Ref.      |
|---------------------------------------------------------------|------------------------|----------------|---------------------------|-----------|
| Ti <sub>3</sub> C <sub>2</sub> T <sub>x</sub> MXene@GO        | -49.10                 | 1.2            | 2.9                       | 1         |
| CeO <sub>2-x</sub> /rGO                                       | -50.60                 | 1.5            | 5.8                       | 2         |
| Nitrogen-doped rGO aerogels                                   | -56.40                 | 2.0            | 6.8                       | 3         |
| NiAl-layered hydroxide/rGO                                    | -41.50                 | 1.4            | 4.4                       | 4         |
| Graphene aerogel spheres                                      | -52.70                 | 2.3            | 7.0                       | 5         |
| C@MoO <sub>2</sub> /rGO                                       | -35.40                 | 1.5            | 4.7                       | 6         |
| CoFe <sub>2</sub> O <sub>4</sub> /N-rGO                       | -55.43                 | 2.3            | 7.2                       | 7         |
| rGO/PANI                                                      | -48.00                 | 2.5            | 6.0                       | 8         |
| N/B-rGO                                                       | -52.00                 | 2.8            | 6.0                       | 9         |
| CoNi@NC/NCNT/N-rGO                                            | -43.48                 | 3.0            | 4.2                       | 10        |
| FeNi@NC/NCNT/N-rGO                                            | -39.39                 | 2.0            | 4.4                       | 11        |
| Ni/MXene/RGO aerogel                                          | -75.2                  | 2.1            | 7.3                       | 12        |
| CN-REOs                                                       | -58.24                 | 1.8            | 4.8                       | 13        |
| rGO/Ni hybrids                                                | -39.03                 | 2.0            | 4.3                       | 14        |
| Air@Co@Co <sub>3</sub> Sn <sub>2</sub> @SnO <sub>2</sub> /RGO | -55.49                 | 2.1            | 5.43                      | 15        |
| C-rGO/Fe <sub>3</sub> O <sub>4</sub> carbon foam              | -57.50                 | 3.0            | 6.7                       | This Work |

## References

1. Y. Li, F. B. Meng, Y. Mei, H. G. Wang, Y. F. Guo, Y. Wang, F. X. Peng, F. Huang and Z. W. Zhou, *Chemical Engineering Journal*, 2020, **391**.
2. Q. Q. Li, Y. H. Zhao, X. H. Li, L. Wang, X. Li, J. Zhang and R. C. Che, *Small*, 2020, **16**.
3. R. Shu, G. Zhang, C. Zhang, Y. Wu and J. Zhang, *Advanced Electronic Materials*, 2021, **7**.

4. X. F. Xu, S. H. Shi, Y. L. Tang, G. Z. Wang, M. F. Zhou, G. Q. Zhao, X. C. Zhou, S. W. Lin and F. B. Meng, *Advanced Science*, 2021, **8**.
5. T. Li, D. D. Zhi, Y. Chen, B. Li, Z. W. Zhou and F. B. Meng, *Nano Research*, 2020, **13**, 477-484.
6. C. Wu, Z. F. Chen, M. M. Wang, X. Cao, Y. Zhang, P. Song, T. Y. Zhang, X. L. Ye, Y. Yang, W. H. Gu, J. D. Zhou and Y. Z. Huang, *Small*, 2020, **16**.
7. X. Wang, J. Liao, R. Du, G. Wang, N. Tsidaeva and W. Wang, *Journal of Colloid and Interface Science*, 2021, **590**, 186-198.
8. L. Zhang, Z. Zhang, Y. Lv, X. Chen, Z. Wu, Y. He and Y. Zou, *Acs Applied Nano Materials*, 2020, **3**, 5978-5986.
9. Z. H. Sun, Z. Q. Yan, K. C. Yue, A. R. Li and L. Qian, *Composites Part B-Engineering*, 2020, **196**.
10. J. Xu, Y. A. Shi, X. C. Zhang, H. R. Yuan, B. Li, C. L. Zhu, X. T. Zhang and Y. J. Chen, *Journal of Materials Chemistry C*, 2020, **8**, 7847-7857.
11. J. Xu, X. Zhang, H. R. Yuan, S. Zhang, C. L. Zhu, X. T. Zhang and Y. J. Chen, *Carbon*, 2020, **159**, 357-365.
12. L. Y. Liang, Q. M. Li, X. Yan, Y. Z. Feng, Y. M. Wang, H. B. Zhang, X. P. Zhou, C. T. Liu, C. Y. Shen and X. L. Xie, *Acs Nano*, 2021, **15**, 6622-6632.
13. S. Gao, G. S. Wang, L. Guo and S. H. Yu, *Small*, 2020, **16**, 13.
14. W. Xu, G. S. Wang and P. G. Yin, *Carbon*, 2018, **139**, 759-767.
15. G. S. Wen, X. C. Zhao, Y. Liu, D. Z. Yan and Z. Z. Hou, *Chem. Eng. J.*, 2021, **420**, 9.
